# Supplementary material
Source: PubMed Central journal article supplement (PMC3431572)

**TABLE 1 - Characteristics of Cadaver Cases.**

| Case ID   | Age (years) | Sex (M/F) | BMI (kg/m <sup>2</sup> ) | Cause of death                          |
|-----------|-------------|-----------|--------------------------|-----------------------------------------|
| UC-01*    | -0.25       | F         | N/A                      | Respiratory failure                     |
| UC-02*    | -0.25       | F         | 4.1                      | Respiratory failure                     |
| UC-03*    | -0.04       | F         | 12.1                     | Respiratory failure                     |
| UC-04*    | 0.01        | M         | 10                       | Respiratory failure                     |
| UC-05     | 0.04        | F         | 12.1                     | Sepsis                                  |
| UC-06     | 0.08        | F         | 27.5                     | Volvulus                                |
| nPOD-6116 | 0.17        | F         | 23.6                     | Pre-existing condition                  |
| nPOD-6117 | 0.33        | M         | 18.4                     | Head trauma (MVA)                       |
| nPOD-6125 | 0.42        | M         | 18.9                     | Bacterial Meningitis                    |
| nPOD-6122 | 0.42        | F         | 13.8                     | Head trauma                             |
| nPOD-6115 | 0.42        | M         | 17.1                     | Anoxia                                  |
| nPOD-6092 | 0.5         | F         | 13.8                     | Anoxia                                  |
| UC-07*    | 0.58        | M         | 23.8                     | Respiratory failure                     |
| UC-08     | 0.67        | M         | 19.2                     | Meningitis                              |
| nPOD-6072 | 1.0         | F         | 14.2                     | Anoxia                                  |
| UC-09     | 1.4         | M         | 21.3                     | Pneumonia                               |
| nPOD-6103 | 1.5         | M         | 16.8                     | Anoxia                                  |
| UC-10*    | 1.75        | F         | N/A                      | Pneumonia                               |
| nPOD-6090 | 2           | M         | 18.8                     | Head trauma                             |
| nPOD-6107 | 2           | M         | 15.9                     | Anoxia                                  |
| nPOD-6014 | 2           | M         | 20.7                     | Anoxia                                  |
| nPOD-6094 | 3           | M         | 15.8                     | Anoxia                                  |
| UC-11     | 3           | M         | N/A                      | Gastrointestinal hemorrhage             |
| nPOD-6005 | 5           | F         | 15.7                     | Cerebrovascular/stroke                  |
| nPOD-6047 | 7           | M         | 23.9                     | Anoxia                                  |
| UC-12     | 9           | F         | 29.4                     | Sepsis                                  |
| nPOD-6007 | 9           | M         | N/A                      | N/A                                     |
| UC-13     | 10          | M         | 17.6                     | Intracerebral hemorrhage                |
| UC-14     | 15          | F         | N/A                      | Disseminated Intravascular Coagulopathy |
| nPOD-6096 | 16          | F         | 18.8                     | Head trauma                             |
| nPOD-6075 | 17          | M         | 14.9                     | Anoxia                                  |
| nPOD-6098 | 17          | M         | 22.8                     | Head trauma                             |
| nPOD-6053 | 18          | M         | 21.2                     | Trauma                                  |
| nPOD-6002 | 39          | M         | 23.7                     | Head trauma                             |
| nPOD-6095 | 40          | M         | 22.8                     | Spinal cord injury                      |
| nPOD-6010 | 47          | F         | 19.7                     | Cerebrovascular/stroke                  |
| UC-15     | 50          | F         | 18.2                     | Respiratory failure                     |
| nPOD-6017 | 59          | F         | 24.8                     | Cerebrovascular/stroke                  |
| UC-16     | 71          | M         | 22.8                     | Pulmonary Embolism                      |
| UC-17     | 72          | F         | 16.7                     | Arrhythmia                              |

- Born 25-27 weeks preterm.
- N/A – Not available.

## Supplemental Material:

### Figures Legend –

**Supplemental Figure 1 – Change in Human Pancreatic Islet Size from Mid-Gestation (24 weeks) to Adult (70 years).** Human pancreatic sections were analyzed by immunofluorescence and confocal microscopy as outlined in ‘Research Design & Methods’ for insulin (green), glucagon (orange), somatostatin (red) and nuclei (DAPI; blue). The average islet diameter was calculated per specimen with  $\geq 10$  islets analyzed per section. *Panel A* – shows the average islet diameter ( $\mu\text{m}$ ) for each human specimen during the developmental, neonatal, childhood, adolescent and adult periods (grey circles). The mean  $\pm$  SEM islet diameter ( $\mu\text{m}$ ) for each period is shown in as red circles where \* indicates a significant difference ( $p \leq 0.001$ ) from the average islet diameter ( $\mu\text{m}$ ) found in adult islets. The dashed line indicates the trend in change of the average islet diameter between the different life periods (note that the *x-axis* time scale is different for each period). *Panel B* – an example image of a human 24-week-old premature pancreas (x20 magnification). *Panel C* – an example image of a human full term pancreas (x40 magnification). *Panel D* – an example image of a human 6-month-old pancreas (x20 magnification). *Panel E* – an example image of a human 1-year-old pancreas (x20 magnification). *Panel F* – an example image of a human 14-year-old pancreas (x20 magnification). *Panel G* – an example image of a human 42-year-old pancreas (x20 magnification).

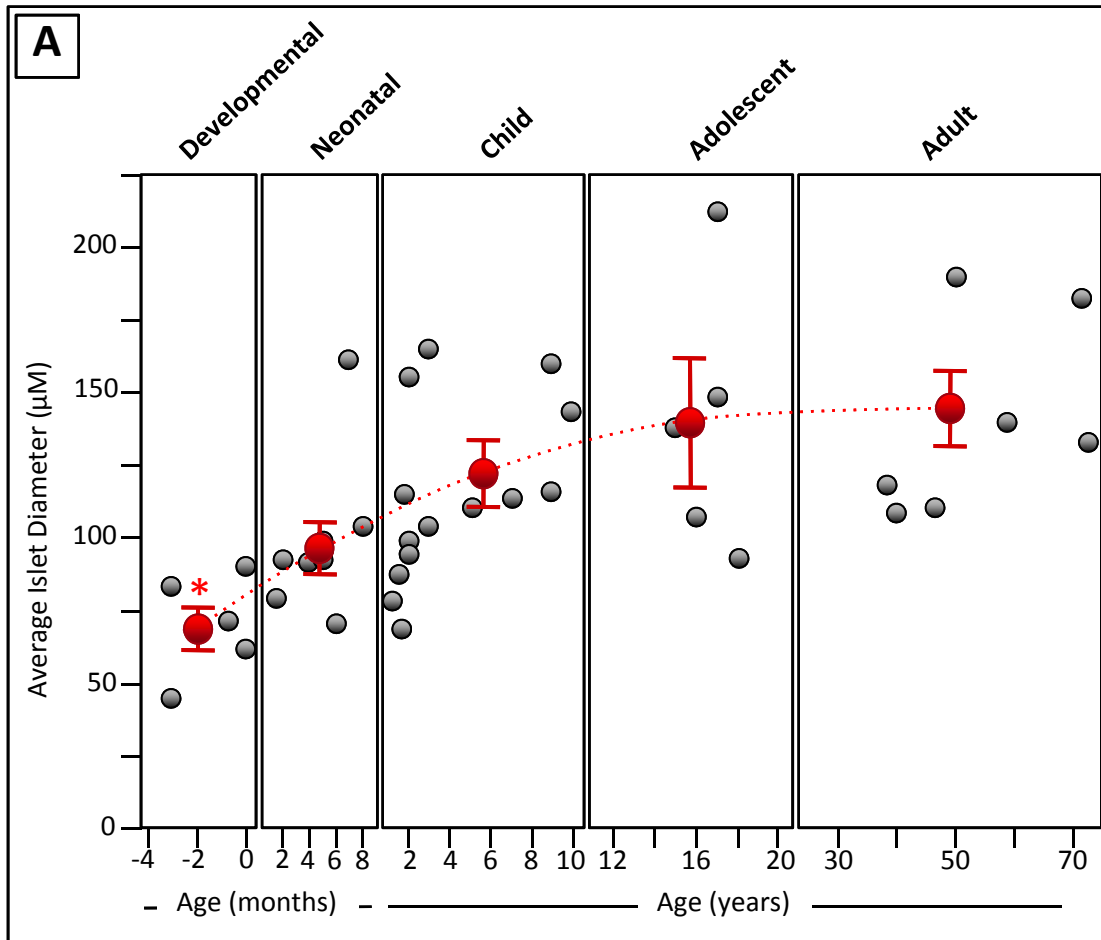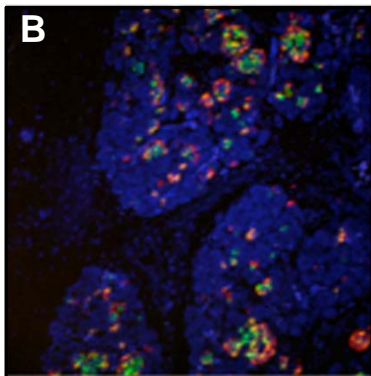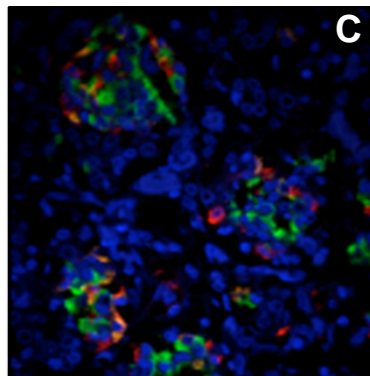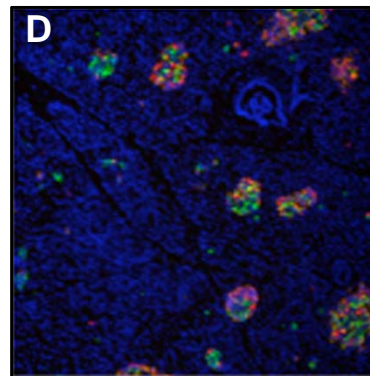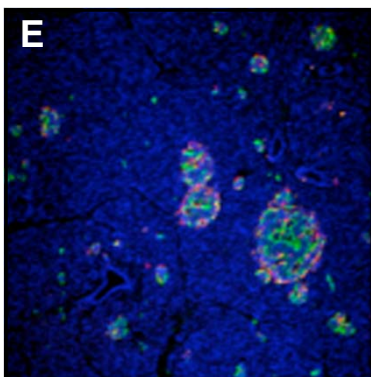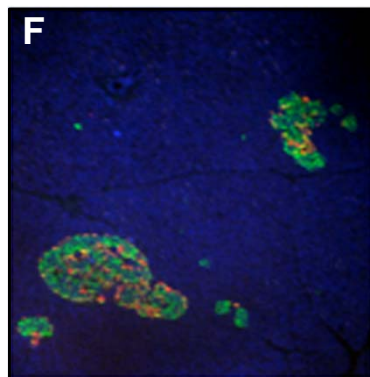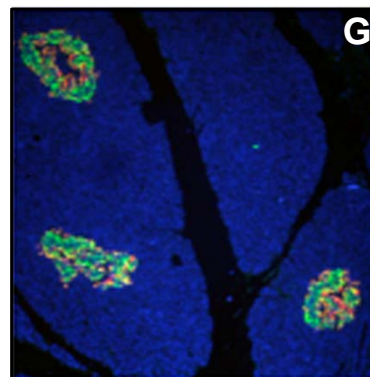

Supplement: supp_jc.2012-1206_12-1206_supp_data.pdf [file supp_jc.2012-1206_12-1206_supp_data.pdf]
